# Supplementary material for: Mitophagy in the Retinal Pigment Epithelium of Dry Age-Related Macular Degeneration Investigated in the NFE2L2/PGC-1α-/- Mouse Model
Source: Int J Mol Sci. 2020 Mar 13;21(6):1976. doi: 10.3390/ijms21061976 (PMC7139489; doi:10.3390/ijms21061976)
Supplement: Supplementary file 1 [file ijms-21-01976-s001.pdf]

## Supplementary data

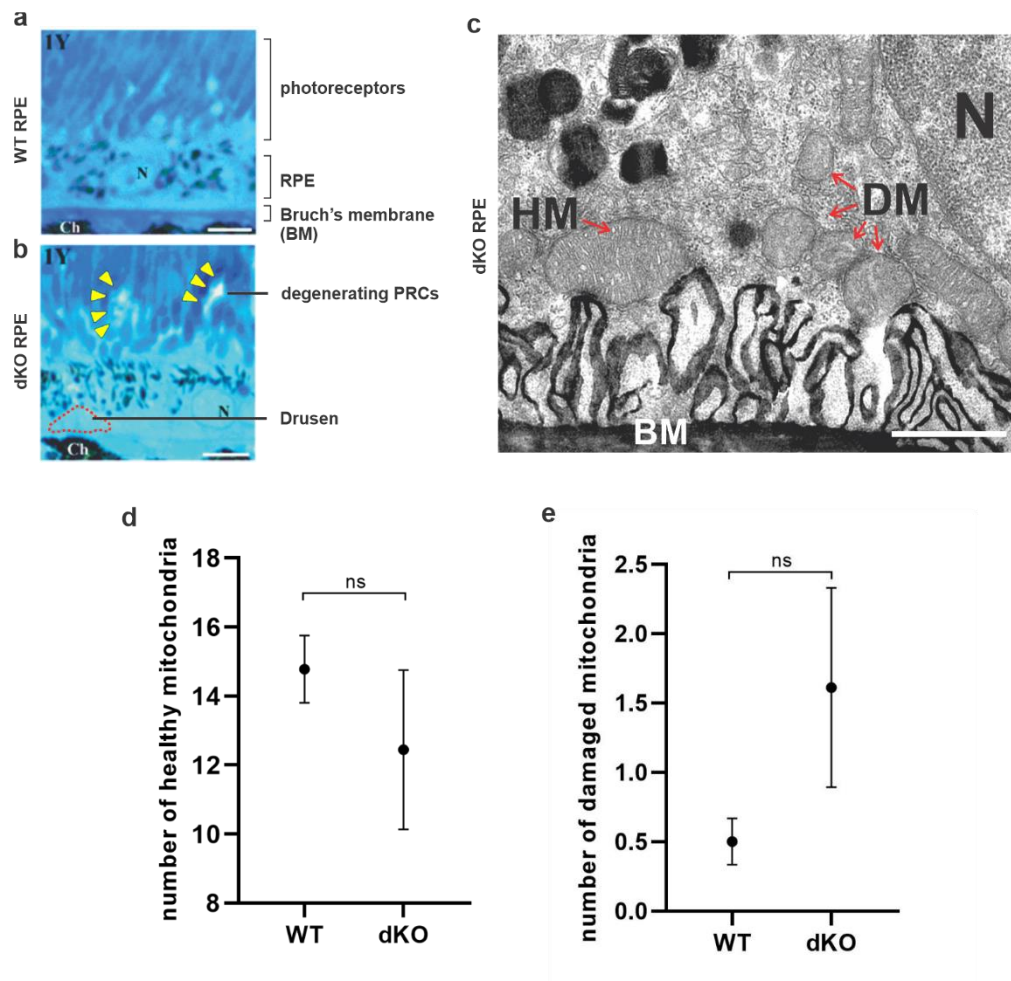

**Supplementary figure 1.** The toluidine blue stained sections from the posterior part of the eye demonstrate the layers of the retina and the morphological relationship of photoreceptor/RPE/Bruch's membrane/ complex (a). The layers of sensory retina are clearly visible. *NFE2L2/PGC-1α* dKO shows positive signs of dry AMD including drusen-like deposits (red dotted lines) (b). The total numbers of healthy and damaged mitochondria were counted from 6 WT and 6 dKO using TEM imaging (c). The total numbers of healthy mitochondria (d) were reduced in dKO ( $p = 0.70$ ); correspondingly, the numbers of damaged mitochondria (e) were increased in dKO ( $p = 0.19$ ). Data are presented as mean  $\pm$  SEM, Scale = 5  $\mu$ m (a,b) and 1  $\mu$ m (c). Healthy mitochondria (HM), damaged mitochondria (DM), Nuclei (N) and Bruch's membrane (BM). ns- non significance.

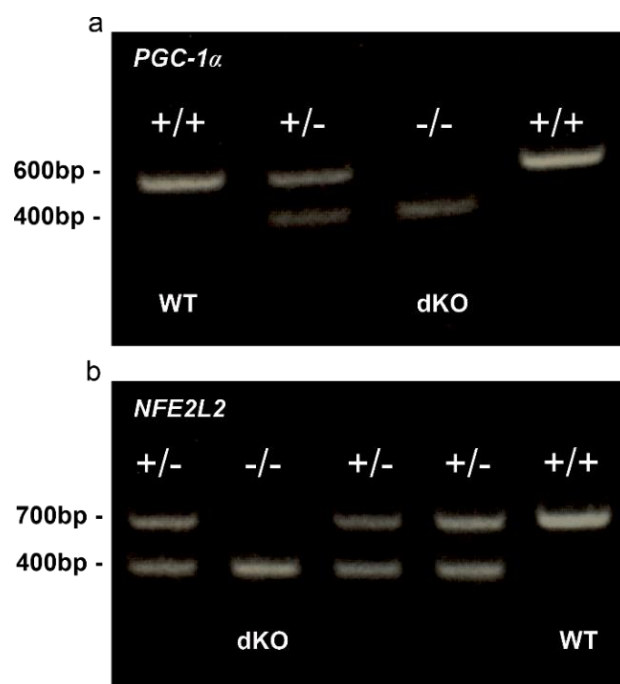

**Supplementary figure 2.** Genotyping of *NFE2L2* and *PGC-1 $\alpha$*  double knockout mice (dKO) and wild type (WT).
